# Supplementary material for: CystiHuman: A model of human neurocysticercosis
Source: PLoS Comput Biol. 2022 May 19;18(5):e1010118. doi: 10.1371/journal.pcbi.1010118 (PMC9159625; doi:10.1371/journal.pcbi.1010118)
Supplement: S1 Data — (XLSX) [file pcbi.1010118.s005.xlsx]

## Sheet: Dataset
Type of epilepsy	Cause of epilepsy	Use of anthelminthics	Use of AEDs	Time from first seizure	NCC diagnosis (CT scan)	NCC type	Nomber of cases
1	1	2	2	2	1	1	13
1	1	2	2	2	1	2	1
1	1	2	2	2	1	3	4
1	1	2	2	2	1	7	1
1	1	2	2	2	2	1	31
1	1	2	2	2	2	2	1
1	1	2	2	2	2	3	5
1	1	2	2	2	9	9	34
1	1	2	2	2	3	9	9
1	1	2	2	2	7	9	1
1	1	2	2	1	1	1	13
1	1	2	2	1	1	2	10
1	1	2	2	1	1	3	5
1	1	2	2	1	1	7	1
1	1	2	2	1	2	1	19
1	1	2	2	1	2	2	3
1	1	2	2	1	2	3	4
1	1	2	2	1	9	9	42
1	1	2	2	1	3	9	14
1	1	2	2	1	7	9	1
1	1	2	2	7	1	1	1
1	1	2	2	7	1	2	1
1	1	2	2	7	1	3	1
1	1	2	2	7	2	1	6
1	1	2	2	7	2	2	2
1	1	2	2	7	9	9	9
1	1	2	2	7	3	9	6
1	1	2	1	2	1	1	10
1	1	2	1	2	1	3	2
1	1	2	1	2	2	1	10
1	1	2	1	2	2	2	1
1	1	2	1	2	9	9	14
1	1	2	1	2	3	9	1
1	1	2	1	2	7	9	1
1	1	2	1	1	1	1	6
1	1	2	1	1	1	2	1
1	1	2	1	1	1	3	1
1	1	2	1	1	2	1	3
1	1	2	1	1	2	2	2
1	1	2	1	1	2	3	1
1	1	2	1	1	9	9	26
1	1	2	1	1	3	9	3
1	1	2	1	7	1	1	4
1	1	2	1	7	2	3	1
1	1	2	1	7	9	9	3
1	1	2	1	7	3	9	1
1	1	1	2	2	1	1	1
1	1	1	2	2	9	9	1
1	1	1	2	1	1	1	2
1	1	1	2	1	1	2	2
1	1	1	2	1	9	9	4
1	1	1	2	7	9	9	1
1	1	1	1	2	1	3	1
1	1	1	1	1	1	1	1
1	1	1	1	1	1	2	1
1	1	1	1	1	9	9	1
1	1	1	1	7	1	2	1
1	1	1	1	7	9	9	2
1	2	2	2	2	1	1	5
1	2	2	2	2	1	3	1
1	2	2	2	2	2	1	22
1	2	2	2	2	2	2	1
1	2	2	2	2	2	3	3
1	2	2	2	2	9	9	86
1	2	2	2	2	3	9	89
1	2	2	2	2	7	9	9
1	2	2	2	1	1	1	1
1	2	2	2	1	1	2	1
1	2	2	2	1	2	1	8
1	2	2	2	1	2	3	2
1	2	2	2	1	2	7	1
1	2	2	2	1	9	9	115
1	2	2	2	1	3	9	113
1	2	2	2	1	7	9	6
1	2	2	2	7	1	1	1
1	2	2	2	7	1	2	1
1	2	2	2	7	1	3	1
1	2	2	2	7	2	2	1
1	2	2	2	7	2	3	1
1	2	2	2	7	9	9	20
1	2	2	2	7	3	9	34
1	2	2	1	2	1	1	2
1	2	2	1	2	1	3	1
1	2	2	1	2	2	1	6
1	2	2	1	2	9	9	62
1	2	2	1	2	3	9	37
1	2	2	1	1	1	1	1
1	2	2	1	1	2	1	2
1	2	2	1	1	2	2	2
1	2	2	1	1	9	9	57
1	2	2	1	1	3	9	44
1	2	2	1	1	7	9	1
1	2	2	1	7	2	1	2
1	2	2	1	7	2	3	2
1	2	2	1	7	9	9	20
1	2	2	1	7	3	9	10
1	2	2	1	7	7	9	2
1	2	1	2	7	9	9	1
1	3	2	2	2	1	1	6
1	3	2	2	2	1	2	1
1	3	2	2	2	1	7	1
1	3	2	2	2	2	1	29
1	3	2	2	2	2	2	2
1	3	2	2	2	2	3	3
1	3	2	2	2	2	7	1
1	3	2	2	2	9	9	63
1	3	2	2	2	3	9	58
1	3	2	2	2	7	9	2
1	3	2	2	1	1	1	6
1	3	2	2	1	1	2	1
1	3	2	2	1	1	3	1
1	3	2	2	1	2	1	17
1	3	2	2	1	2	2	1
1	3	2	2	1	2	3	2
1	3	2	2	1	9	9	48
1	3	2	2	1	3	9	59
1	3	2	2	1	7	9	2
1	3	2	2	7	1	1	3
1	3	2	2	7	1	2	1
1	3	2	2	7	1	3	1
1	3	2	2	7	2	1	4
1	3	2	2	7	2	2	1
1	3	2	2	7	2	3	1
1	3	2	2	7	9	9	21
1	3	2	2	7	3	9	16
1	3	2	2	7	7	9	3
1	3	2	1	2	2	1	3
1	3	2	1	2	9	9	17
1	3	2	1	2	3	9	14
1	3	2	1	2	7	9	2
1	3	2	1	1	1	2	2
1	3	2	1	1	1	3	1
1	3	2	1	1	2	1	1
1	3	2	1	1	9	9	21
1	3	2	1	1	3	9	7
1	3	2	1	7	2	1	2
1	3	2	1	7	2	7	1
1	3	2	1	7	9	9	13
1	3	2	1	7	3	9	3
1	3	1	2	2	9	9	1
1	3	1	2	1	1	1	2
1	3	1	2	1	1	2	2
1	3	1	2	1	9	9	2
1	3	1	1	1	3	9	1
2	1	2	2	2	1	1	7
2	1	2	2	2	1	7	1
2	1	2	2	2	2	1	14
2	1	2	2	2	2	2	1
2	1	2	2	2	2	3	2
2	1	2	2	2	9	9	1
2	1	2	2	2	3	9	3
2	1	2	2	1	2	1	1
2	1	2	2	1	3	9	2
2	1	2	2	7	1	1	1
2	1	2	2	7	1	3	1
2	1	2	2	7	2	1	1
2	1	2	2	7	9	9	1
2	1	2	2	7	7	9	1
2	1	2	1	2	1	7	1
2	1	2	1	2	2	3	1
2	1	2	1	2	9	9	1
2	1	1	2	2	1	1	2
2	2	2	2	2	1	1	4
2	2	2	2	2	1	3	2
2	2	2	2	2	2	1	12
2	2	2	2	2	2	3	1
2	2	2	2	2	2	7	1
2	2	2	2	2	9	9	3
2	2	2	2	2	3	9	52
2	2	2	2	2	7	9	3
2	2	2	2	1	1	3	1
2	2	2	2	1	2	3	1
2	2	2	2	1	2	7	1
2	2	2	2	1	9	9	1
2	2	2	2	1	3	9	14
2	2	2	2	1	7	9	2
2	2	2	2	7	1	1	1
2	2	2	2	7	9	9	4
2	2	2	2	7	3	9	9
2	2	2	2	7	7	9	1
2	2	2	1	7	9	9	1
2	2	2	1	7	3	9	1
2	3	2	2	2	1	1	3
2	3	2	2	2	1	2	1
2	3	2	2	2	1	3	5
2	3	2	2	2	2	1	18
2	3	2	2	2	2	2	2
2	3	2	2	2	2	3	3
2	3	2	2	2	9	9	16
2	3	2	2	2	3	9	15
2	3	2	2	2	7	9	2
2	3	2	2	1	2	1	1
2	3	2	2	1	2	2	1
2	3	2	2	1	9	9	3
2	3	2	2	1	3	9	1
2	3	2	2	7	1	2	1
2	3	2	2	7	2	1	2
2	3	2	2	7	9	9	2
2	3	2	2	7	3	9	5
2	3	2	1	2	1	1	2
2	3	2	1	2	1	2	1
2	3	2	1	2	2	1	2
2	3	2	1	2	9	9	1
2	3	2	1	7	2	1	1
2	3	1	2	2	1	1	1
3	1	2	2	2	1	1	2
3	1	2	2	2	2	1	1
3	1	2	2	2	2	3	1
3	1	2	2	2	3	9	1
3	1	2	2	1	1	3	1
3	1	2	2	1	2	1	4
3	1	2	2	1	2	2	2
3	1	2	2	1	9	9	7
3	1	2	2	7	2	1	1
3	1	2	2	7	9	9	4
3	1	2	1	1	9	9	2
3	1	2	1	7	1	2	2
3	1	2	1	7	2	1	1
3	1	2	1	7	2	2	1
3	1	2	1	7	9	9	7
3	1	1	2	1	1	1	1
3	1	1	2	7	1	1	1
3	1	1	2	7	9	9	1
3	2	2	2	2	1	1	1
3	2	2	2	2	2	1	2
3	2	2	2	2	3	9	7
3	2	2	2	2	7	9	1
3	2	2	2	1	9	9	3
3	2	2	2	1	3	9	8
3	2	2	2	7	1	1	1
3	2	2	2	7	2	1	1
3	2	2	2	7	9	9	5
3	2	2	2	7	3	9	7
3	2	2	1	2	1	1	1
3	2	2	1	2	9	9	1
3	2	2	1	2	3	9	2
3	2	2	1	1	3	9	4
3	2	2	1	7	9	9	5
3	2	2	1	7	3	9	4
3	3	2	2	2	2	1	3
3	3	2	2	2	2	2	1
3	3	2	2	2	9	9	6
3	3	2	2	2	3	9	3
3	3	2	2	1	2	1	1
3	3	2	2	1	9	9	3
3	3	2	2	7	1	1	2
3	3	2	2	7	2	1	2
3	3	2	2	7	9	9	12
3	3	2	2	7	3	9	9
3	3	2	1	2	7	9	1
3	3	2	1	7	1	1	3
3	3	2	1	7	9	9	13
3	3	2	1	7	3	9	9

## Sheet: Glossary
Column	Code	Meaning
Type of epilepsy	1	Active epilepsy
Type of epilepsy	2	Inactive epilepsy
Type of epilepsy	3	Not epilepsy (includes single seizures and no history of seizures) or unclear diagnosis
Cause of epilepsy	1	NCC likely the or one of the causes
Cause of epilepsy	2	NCC not identified as the/one of the causes
Cause of epilepsy	3	Unclear if NCC a cause or no cause mentioned
Use of anthelminthics	1	Anthelminthics used/very likely used
Use of anthelminthics	2	No explicit mention of anthelminthics (mention of other medicines, no medicine, or empty space)
Use od anti-epileptic drugs (AEDs)	1	Uses or has used, or likely used, AEDs
Use od anti-epileptic drugs (AEDs)	2	No explicit mention of AEDs (mention of other medicines, no medicine, or empty space)
Time from first seizure	1	Less than 7.2 years
Time from first seizure	2	7.2 years or more
Time from first seizure	7	No or insufficient timing information
NCC diagnosis (CT scan)	1	Certain/likely NCC
NCC diagnosis (CT scan)	2	Compatible with NCC
NCC diagnosis (CT scan)	3	No NCC
NCC diagnosis (CT scan)	7	Unclear CT diagnostic
NCC diagnosis (CT scan)	9	No CT scan
Parenchymal NCC type	1	Parenchymal calcified NCC lesion(s) only (certain/likely on CT or CT compatible with that diagnosis)
Parenchymal NCC type	2	Parenchymal non-calcified NCC (viable or degenerating) lesion(s), with or without calcified NCC lesions (certain/likely on CT or CT compatible with that diagnosis), no suspected extra-parenchymal lesion, ICH/hydrocephalus or enlargement of extra-parenchymal spaces
Parenchymal NCC type	3	Suspicion or certainty of extra-parenchymal lesions, ICH/hydrocephalus or enlargement of extra-parenchymal spaces
Parenchymal NCC type	7	Unclear type of NCC lesion (e.g. unclear stage of a parenchymal lesion)
Parenchymal NCC type	9	Irrelevant or none (no CT scan, no NCC, or unclear whether the lesions are NCC or not)
